# Supplementary material for: Maternal and Neonatal Factors Modulating Breast Milk Cytokines in the First Month of Lactation
Source: MDPI journal article supplement (doi:10.3390/antiox12050996), 2023-04-25
Supplement: s1 [file s1]

**Table S1.** Breast milk cytokine levels and oxidative status at 7 and 28 days of lactation from women with neonates without adverse outcomes separated by neonatal sex.

| Cytokines and Oxidative status | Day 7                |                        |          | Day 28               |                        |          |
|--------------------------------|----------------------|------------------------|----------|----------------------|------------------------|----------|
|                                | Male ( <i>n</i> =15) | Female ( <i>n</i> =24) | <i>p</i> | Male ( <i>n</i> =14) | Female ( <i>n</i> =18) | <i>p</i> |
| IL-10 Ln(pg/mL)                | -0.20 [-0.22; -0.13] | -0.18 [-0.20; -0.07]   | 0.39     | -0.17 [-0.22; -0.13] | -0.17 [-0.21; -0.07]   | 0.76     |
| IL-13 Ln(pg/mL)                | -0.51 [-0.55; -0.40] | -0.50 [-0.53; -0.42]   | 0.79     | 0.76 [0.13; 1.00]    | 0.59 [-0.13; 0.82]     | 0.49     |
| IL-8 Ln(pg/mL)                 | -0.22 [-0.49; 1.74]  | -0.22 [-0.37; 0.69]    | 0.97     | -0.41 [-0.50; -0.22] | -0.58 [-0.63; -0.24]   | 0.40     |
| MCP-1 Ln(pg/mL)                | 0.27 [-0.41; 1.04]   | 0.95 [0.07; 1.32]      | 0.11     | -0.79 [-0.93; -0.17] | -0.93 [-0.97; -0.55]   | 0.17     |
| TNF $\alpha$ Ln(pg/mL)         | -0.17 [-0.38; 0.10]  | -0.20 [-0.30; 0.12]    | 0.51     | -0.27 [-0.34; -0.08] | -0.32 [-0.40; -0.26]   | 0.27     |
| Inflammatory index             | 0.01 [-0.25; 0.47]   | -0.12 [-0.39; 0.73]    | 0.76     | -0.27 [-0.34; -0.08] | -0.13 [-0.40; 0.21]    | 0.91     |
| ABTS Ln(mg TE/mL)              | 1.02 [0.62; 1.39]    | 0.40 [-0.01; 0.90]     | 0.004    | -0.72 [-1.14; -0.44] | -1.04 [-1.24; -0.55]   | 0.44     |
| MDA+HNE Ln( $\mu$ M)           | -0.09 [-0.32; 0.53]  | 0.17 [-0.19; 0.59]     | 0.50     | -0.56 [-0.94; -0.06] | -0.45 [-0.96; -0.03]   | 0.91     |

Data show median and interquartile range [Q1; Q3] of cytokines after logarithm (Ln) transformation and typification. The *p*-Value (P) was extracted from independent Wilcoxon test. ABTS: 2,20-azino-bis-3-ethylbenzothiazoline-6-sulfonic acid; TE: Trolox equivalent; MDA: malondialdehyde; HNE: 4-Hydroxy-Trans-2-Nonenal.

**Table S2.** Breast milk cytokine levels and oxidative status at 7 and 28 days of lactation from women with and without C-section.

| Cytokine and<br>Oxidative status | Day 7                   |                           |          | Day 28                  |                           |          |
|----------------------------------|-------------------------|---------------------------|----------|-------------------------|---------------------------|----------|
|                                  | Vaginal ( <i>n</i> =30) | C-section ( <i>n</i> =14) | <i>p</i> | Vaginal ( <i>n</i> =24) | C-section ( <i>n</i> =12) | <i>p</i> |
| IL-10 Ln(pg/mL)                  | -0.19 [-0.21; -0.13]    | -0.17 [-0.20; -0.02]      | 0.20     | -0.16 [-0.21; -0.06]    | -0.19 [-0.22; -0.16]      | 0.26     |
| IL-13 Ln(pg/mL)                  | -0.50 [-0.53; -0.42]    | -0.52 [-0.55; -0.42]      | 0.47     | 0.66 [0.10; 0.99]       | 0.61 [-0.02; 0.78]        | 0.66     |
| IL-8 Ln(pg/mL)                   | -0.22 [-0.48; 0.73]     | 0.09 [-0.35; 1.37]        | 0.44     | -0.42 [-0.62; -0.20]    | -0.49 [-0.61; -0.32]      | 0.68     |
| MCP-1 Ln(pg/mL)                  | 0.28 [-0.25; 1.16]      | 1.18 [0.71; 1.63]         | 0.018    | -0.92 [-0.97; -0.60]    | -0.48 [-0.92; -0.23]      | 0.17     |
| TNF $\alpha$ Ln(pg/mL)           | -0.19 [-0.37; 0.03]     | -0.19 [-0.26; 0.24]       | 0.29     | -0.28 [-0.38; -0.08]    | -0.32 [-0.40; -0.27]      | 0.37     |
| Inflammatory index               | -0.11 [-0.28; 0.62]     | -0.08 [-0.38; 0.42]       | 0.99     | -0.13 [-0.44; 0.24]     | -0.30 [-0.38; 0.26]       | 0.83     |
| ABTS Ln(mg TE/mL)                | 0.69 [0.01; 1.12]       | 0.87 [0.51; 1.10]         | 0.29     | -0.92 [-1.24; -0.53]    | -0.79 [-1.15; -0.36]      | 0.50     |
| MDA+HNE Ln( $\mu$ M)             | 0.05 [-0.23; 1.03]      | 0.00 [-0.63; 0.24]        | 0.26     | -0.41 [-1.00; -0.13]    | -0.60 [-0.92; 0.06]       | 0.76     |

Data show median and interquartile range [Q1; Q3] of cytokines after logarithm (Ln) transformation and typification. Women c-section, cesarean section. The *p*-Value (P) was extracted from independent Wilcoxon test. ABTS: 2,20-azino-bis-3-ethylbenzothiazoline-6-sulfonic acid; TE: Trolox equivalent; MDA: malondialdehyde; HNE: 4-Hydroxy-Trans-2-Nonenal.

**Table S3.** Breast milk cytokine levels and oxidative status at 7 and 28 days of lactation comparing women with and without obstetric complications.

| Cytokine and Oxidative status | Day 7                |                      |          | Day 28               |                      |          |
|-------------------------------|----------------------|----------------------|----------|----------------------|----------------------|----------|
|                               | No ( <i>n</i> = 27)  | Yes ( <i>n</i> = 12) | <i>p</i> | No ( <i>n</i> = 25)  | Yes ( <i>n</i> =11)  | <i>p</i> |
| IL-10 Ln(pg/mL)               | -0.20 [-0.21; -0.09] | -0.15 [-0.20; -0.07] | 0.15     | -0.18 [-0.22; -0.07] | -0.16 [-0.18; -0.10] | 0.31     |
| IL-13 Ln(pg/mL)               | -0.52 [-0.54; -0.48] | -0.46 [-0.51; -0.29] | 0.10     | 0.60 [-0.23; 0.84]   | 0.61 [0.41; 1.01]    | 0.43     |
| IL-8 Ln(pg/mL)                | -0.22 [-0.40; 0.66]  | 0.24 [-0.37; 2.77]   | 0.25     | -0.48 [-0.63; -0.27] | -0.42 [-0.55; -0.21] | 0.54     |
| MCP-1 Ln(pg/mL)               | 0.46 [-0.12; 1.26]   | 0.95 [0.19; 1.21]    | 0.59     | -0.86 [-0.96; -0.54] | -0.63 [-0.94; -0.28] | 0.60     |
| TNF $\alpha$ Ln(pg/mL)        | -0.25 [-0.35; 0.00]  | -0.04 [-0.19; 0.38]  | 0.05     | -0.33 [-0.40; -0.19] | -0.27 [-0.33; -0.26] | 0.71     |
| Inflammatory index            | -0.08 [-0.38; 0.99]  | -0.18 [-0.67; 0.04]  | 0.33     | 0.07 [-0.38; 0.35]   | -0.39 [-0.77; -0.11] | 0.021    |
| ABTS Ln(mg TE/mL)             | 0.87 [0.16; 1.09]    | 0.69 [0.18; 1.05]    | 0.81     | -0.91 [-1.36; -0.49] | -0.98 [-1.14; -0.49] | 0.73     |
| MDA+HNE Ln( $\mu$ M)          | 0.04 [-0.35; 0.56]   | 0.13 [-0.07; 0.75]   | 0.56     | -0.50 [-1.06; 0.06]  | -0.36 [-0.73; -0.17] | 0.43     |

Data show median and interquartile range [Q1; Q3] of cytokines after logarithm (Ln) transformation and typification. Women diagnosed with an obstetric complication were categorized as “yes”, otherwise they were categorized as “no”. The *p*-Value (P) was extracted from independent Wilcoxon test. ABTS: 2,20-azino-bis-3-ethylbenzothiazoline-6-sulfonic acid; TE: Trolox equivalent; MDA: malondialdehyde; HNE: 4-Hydroxy-Trans-2-Nonenal.
